# Supplementary material for: Transcriptomic and Metabolomic Analysis Revealed Roles of Yck2 in Carbon Metabolism and Morphogenesis of Candida albicans
Source: PubMed Central journal article supplement (PMC8008151; doi:10.3389/fcimb.2021.636834), 2021-03-16
Supplement: Table_1.pdf [file Table_1.pdf]

**Supplemental Table S1 - Comprehensive list of differentially expressed genes in the *yck2*  $\Delta$  strain relative to the wild-type strain**

| Categorization                                         | Gene   |                            |                                                                                                                                                             | Log2       |           |
|--------------------------------------------------------|--------|----------------------------|-------------------------------------------------------------------------------------------------------------------------------------------------------------|------------|-----------|
|                                                        | Name   | orf19_ID                   | Description (taken from literature and <i>candidagenome.org</i> )                                                                                           | Foldchange | P-value   |
| <i>Glucose Repressed Genes and Hexose Transporters</i> | HGT1   | <a href="#">orf19.4527</a> | High-affinity MFS glucose transporter                                                                                                                       | 2.24       | 1.11E-09  |
|                                                        | HGT2   | <a href="#">orf19.3668</a> | Putative MFS glucose transporter                                                                                                                            | 4.75       | 1.36E-102 |
|                                                        | HGT4   | <a href="#">orf19.5962</a> | High-affinity glucose sensor; part of the SRR pathway; overexpression causes hyperfilamentation                                                             | 1.62       | 1.61E-10  |
|                                                        | HGT9   | <a href="#">orf19.644</a>  | Putative glucose transporter                                                                                                                                | 6.50       | 6.62E-06  |
|                                                        | HGT12  | <a href="#">orf19.7094</a> | Expressed at low (0.2%) and high (5%) glucose concentrations                                                                                                | 5.54       | 9.82E-49  |
|                                                        | HGT13  | <a href="#">orf19.7093</a> | Predicted sugar transporter, involved in glycerol utilization                                                                                               | 2.89       | 4.52E-28  |
|                                                        | HGT17  | <a href="#">orf19.4682</a> | Putative glucose transporter; induced at low glucose concentrations                                                                                         | 8.72       | 2.13E-21  |
|                                                        | HGT19  | <a href="#">orf19.5447</a> | Putative MFS glucose/myo-inositol transporter; Responds to Hog1 stress response                                                                             | 3.01       | 1.25E-36  |
|                                                        | HXT5   | <a href="#">orf19.4384</a> | Putative hexose transporter; colony morphology-related gene regulation; possibly essential                                                                  | 2.99       | 6.51E-28  |
|                                                        | MAL31  | <a href="#">orf19.3981</a> | Putative high-affinity maltose transporter                                                                                                                  | 3.02       | 1.78E-04  |
| <i>Glycolysis</i>                                      | TYE7   | <a href="#">orf19.4941</a> | Transcriptional regulator of glycolytic genes; regulates PFK1 and PFK2                                                                                      | -3.02      | 3.14E-05  |
|                                                        | PFK2   | <a href="#">orf19.6540</a> | Phosphofructokinase beta subunit                                                                                                                            | -2.35      | 1.02E-04  |
|                                                        | PFK1   | <a href="#">orf19.3967</a> | Phosphofructokinase alpha subunit                                                                                                                           | -1.81      | 1.15E-02  |
|                                                        | HXK2   | <a href="#">orf19.542</a>  | Hexokinase 2; catalyzes first step of glycolysis                                                                                                            | -3.13      | 6.62E-13  |
|                                                        | PGK1   | <a href="#">orf19.3651</a> | Phosphoglycerate kinase                                                                                                                                     | -1.49      | 3.72E-05  |
|                                                        | GPM2   | <a href="#">orf19.1067</a> | Putative phosphoglycerate mutase                                                                                                                            | -1.67      | 3.11E-04  |
|                                                        | ENO1   | <a href="#">orf19.395</a>  | Enolase                                                                                                                                                     | -1.30      | 2.66E-05  |
|                                                        | TDH3   | <a href="#">orf19.6814</a> | Glyceraldehyde-3-phosphate dehydrogenase                                                                                                                    | -1.39      | 3.44E-06  |
|                                                        | TPI1   | <a href="#">orf19.6745</a> | Triose-phosphate isomerase                                                                                                                                  | -1.10      | 1.16E-03  |
|                                                        | FBA1   | <a href="#">orf19.4618</a> | Fructose-bisphosphate aldolase                                                                                                                              | -1.68      | 1.48E-06  |
| <i>Beta-Oxidation</i>                                  | PXP2   | <a href="#">orf19.1655</a> | Putative acyl-CoA oxidase; putative peroxisome targeting signal                                                                                             | 5.85       | 1.35E-147 |
|                                                        | POX1-3 | <a href="#">orf19.1652</a> | Predicted acyl-CoA oxidase                                                                                                                                  | 2.45       | 2.53E-53  |
|                                                        | FOX3   | <a href="#">orf19.1704</a> | Putative peroxisomal 3-oxoacyl CoA thiolase                                                                                                                 | 2.45       | 2.16E-84  |
|                                                        | FOX2   | <a href="#">orf19.1288</a> | 3-hydroxyacyl-CoA epimerase                                                                                                                                 | 3.50       | 2.97E-81  |
|                                                        | POT1   | <a href="#">orf19.7520</a> | Putative peroxisomal 3-oxoacyl CoA thiolase; transcript regulated by Nrg1p and Mig1p                                                                        | 2.57       | 7.05E-59  |
|                                                        | HPD1   | <a href="#">orf19.5565</a> | 3-hydroxypropionate dehydrogenase; involved in degradation of toxic propionyl-CoA                                                                           | 5.10       | 2.35E-66  |
|                                                        | ALD6   | <a href="#">orf19.742</a>  | Putative aldehyde dehydrogenase                                                                                                                             | 5.41       | 2.49E-162 |
| <i>Glyoxylate Cycle</i>                                | ICL1   | <a href="#">orf19.6844</a> | Isocitrate lyase; glyoxylate cycle enzyme; required for virulence in mice; induced upon phagocytosis by macrophage; Pex5-dependent peroxisomal localization | 5.22       | 2.10E-56  |
|                                                        | MLS1   | <a href="#">orf19.4833</a> | Malate synthase; glyoxylate cycle enzyme; strong oxidative stress induced                                                                                   | 2.76       | 2.58E-23  |
| <i>Acetyl Transport</i>                                | CTN1   | <a href="#">orf19.4551</a> | carnitine O-acetyltransferase                                                                                                                               | 5.71       | 3.96E-41  |
|                                                        | CTN3   | <a href="#">orf19.2809</a> | carnitine O-acetyltransferase                                                                                                                               | 3.48       | 9.14E-24  |

|                                     |                                    |                            |                                                                                                                                                              |                                                                                                                                           |           |          |
|-------------------------------------|------------------------------------|----------------------------|--------------------------------------------------------------------------------------------------------------------------------------------------------------|-------------------------------------------------------------------------------------------------------------------------------------------|-----------|----------|
| <i>GABA Metabolism</i>              | CAALFM_C303470                     | <a href="#">orf19.345</a>  | Succinate semialdehyde dehydrogenase; for utilization of gamma-aminobutyrate (GABA) as a nitrogen source; part of GABA and glutamate degradation pathways    | 2.20                                                                                                                                      | 7.98E-26  |          |
|                                     | WA                                 |                            |                                                                                                                                                              |                                                                                                                                           |           |          |
| <i>Hyphal-Specific Genes (HSGs)</i> | BRG1                               | <a href="#">orf19.4056</a> | Transcription factor; recruits Hda1p to promoters of hyphal-specific genes                                                                                   | 1.62                                                                                                                                      | 4.57E-02  |          |
|                                     | UME6                               | <a href="#">orf19.1822</a> | Activator of downstream hyphal genes; expression is dependent on Brg1 mediated recruitment of Hda1 to UME6 promoter                                          | 2.74                                                                                                                                      | 1.36E-04  |          |
|                                     | ALS3                               | <a href="#">orf19.1816</a> | Cell wall adhesin; epithelial adhesion, endothelial invasion                                                                                                 | 2.43                                                                                                                                      | 4.48E-02  |          |
|                                     | ALS1                               | <a href="#">orf19.5741</a> | Cell-surface adhesin; adhesion, virulence                                                                                                                    | 3.10                                                                                                                                      | 1.67E-05  |          |
|                                     | HWP1                               | <a href="#">orf19.1321</a> | Hyphal cell wall protein                                                                                                                                     | 1.28                                                                                                                                      | 3.76E-01  |          |
|                                     | ECE1                               | <a href="#">orf19.3374</a> | GPI-linked cell wall protein                                                                                                                                 | 2.18                                                                                                                                      | 1.54E-01  |          |
|                                     | HGC1                               | <a href="#">orf19.6028</a> | Hypha-specific G1 cyclin-related protein involved in regulation of morphogenesis, biofilm formation; required for virulence in mice; regulated by Nrg1, Tup1 | 2.67                                                                                                                                      | 2.54E-03  |          |
|                                     | RBT1                               | <a href="#">orf19.1327</a> | Cell wall protein with similarity to Hwp1; required for virulence; serum, hyphal and alkaline induced                                                        | 3.77                                                                                                                                      | 1.15E-06  |          |
|                                     | RBT4                               | <a href="#">orf19.6202</a> | TUP1 repressed; Pry family protein; required for virulence in mouse systemic/rabbit corneal infections                                                       | 2.14                                                                                                                                      | 6.75E-32  |          |
|                                     | ECM331                             | <a href="#">orf19.4255</a> | GPI-linked cell wall protein                                                                                                                                 | 3.27                                                                                                                                      | 5.28E-52  |          |
|                                     | SAP6                               | <a href="#">orf19.5542</a> | Biofilm-specific aspartyl protease; expressed during hyphal growth, oral carriage, infection; virulence role affected by URA3                                | 2.18                                                                                                                                      | 6.59E-06  |          |
|                                     | DDR48                              | <a href="#">orf19.4082</a> | Immunogenic stress-associated protein; Hog1 repressed                                                                                                        | 5.93                                                                                                                                      | 2.78E-102 |          |
|                                     | IHD2                               | <a href="#">orf19.6021</a> | Protein of unknown function; induced in low iron; Spider biofilm induced                                                                                     | 2.66                                                                                                                                      | 2.89E-14  |          |
|                                     | ARO10                              | <a href="#">orf19.1847</a> | Aromatic decarboxylase; Ehrlich fusel oil pathway of aromatic alcohol biosynthesis                                                                           | -2.93                                                                                                                                     | 2.63E-52  |          |
|                                     | RNH1                               | <a href="#">orf19.5563</a> | Ribonuclease H (RNase H)                                                                                                                                     | 2.15                                                                                                                                      | 3.00E-51  |          |
|                                     | GLG2                               | <a href="#">orf19.7434</a> | Putative self-glucosylating initiator of glycogen synthesis                                                                                                  | 3.58                                                                                                                                      | 5.86E-20  |          |
|                                     | CSP37                              | <a href="#">orf19.2531</a> | Hyphal cell wall protein; expressed in yeast and hyphae; hyphal downregulated                                                                                | 2.57                                                                                                                                      | 8.76E-23  |          |
|                                     | <i>Yeast-Specific Genes (YSGs)</i> | IFE2                       | <a href="#">orf19.5288</a>                                                                                                                                   | Putative alcohol dehydrogenase; yeast-enriched transcript; Efg1-regulated; induced by Hog1                                                | -3.17     | 1.09E-02 |
|                                     |                                    | TPO3                       | <a href="#">orf19.4737</a>                                                                                                                                   | Putative polyamine transporter; decreased expression in hyphae vs yeast-form cells; regulated by Nrg1                                     | -2.38     | 1.75E-02 |
|                                     |                                    | OPT9                       | <a href="#">orf19.2584</a>                                                                                                                                   | Probable pseudogene similar to fragments of OPT1 oligopeptide transporter gene; transcriptionally induced upon phagocytosis by macrophage | -2.10     | 1.42E-09 |
| YWP1                                |                                    | <a href="#">orf19.3618</a> | Secreted yeast wall protein                                                                                                                                  | -3.86                                                                                                                                     | 3.54E-43  |          |
| DAK2                                |                                    | <a href="#">orf19.4777</a> | Putative dihydroxyacetone kinase; repressed by yeast-hypha switch                                                                                            | -2.55                                                                                                                                     | 2.04E-03  |          |
| MEP1                                |                                    | <a href="#">orf19.1614</a> | Ammonium permease; hyphal downregulated                                                                                                                      | 2.23                                                                                                                                      | 6.95E-15  |          |
| NRG1                                |                                    | <a href="#">orf19.7150</a> | Transcription factor; represses hyphal-specific genes                                                                                                        | -1.38                                                                                                                                     | 8.31E-05  |          |
|                                     | M_C5021                            | <a href="#">orf19.4216</a> | Putative heat shock protein; decreased expression in hyphae                                                                                                  | 3.78                                                                                                                                      | 1.70E-83  |          |

|                                        |        |                            |                                                                                                                                                                                         |       |           |
|----------------------------------------|--------|----------------------------|-----------------------------------------------------------------------------------------------------------------------------------------------------------------------------------------|-------|-----------|
| <i>Arginine Biosynthesis</i>           | ARG1   | <a href="#">orf19.7469</a> | Argininosuccinate synthase; arginine synthesis                                                                                                                                          | 6.74  | 0.00E+00  |
|                                        | ARG3   | <a href="#">orf19.5610</a> | Putative ornithine carbamoyltransferase; Gcn4-regulated                                                                                                                                 | 5.23  | 9.60E-156 |
|                                        | ARG4   | <a href="#">orf19.6689</a> | Argininosuccinate lyase, catalyzes the final step in the arginine biosynthesis pathway                                                                                                  | 3.90  | 9.02E-171 |
|                                        | ARG5/6 | <a href="#">orf19.4788</a> | Arginine biosynthetic enzyme; processed in <i>S. cerevisiae</i> into 2 polypeptides with acetylglutamate kinase (Arg6) activity and acetylglutamate-phosphate reductase (Arg5) activity | 3.79  | 1.00E-170 |
|                                        | ARG8   | <a href="#">orf19.3770</a> | Putative acetylornithine aminotransferase                                                                                                                                               | 5.95  | 4.06E-179 |
|                                        | CPA1   | <a href="#">orf19.4630</a> | Putative carbamoyl-phosphate synthase subunit                                                                                                                                           | 5.19  | 3.55E-90  |
|                                        | CPA2   | <a href="#">orf19.3221</a> | Putative arginine-specific carbamoylphosphate synthetase                                                                                                                                | 3.96  | 6.58E-143 |
|                                        | ECM42  | <a href="#">orf19.6500</a> | Ornithine acetyltransferase                                                                                                                                                             | 3.31  | 2.36E-80  |
|                                        | GDH3   | <a href="#">orf19.4716</a> | NADP-glutamate dehydrogenase                                                                                                                                                            | 3.40  | 9.09E-48  |
| <i>Arginine Degradation</i>            | CAR1   | <a href="#">orf19.3934</a> | Arginase                                                                                                                                                                                | -1.95 | 1.90E-41  |
|                                        | CAR2   | <a href="#">orf19.5641</a> | Ornithine aminotransferase                                                                                                                                                              | -2.46 | 2.48E-95  |
|                                        | PUT1   | <a href="#">orf19.4274</a> | Putative proline oxidase                                                                                                                                                                | 3.55  | 9.62E-166 |
|                                        | PUT2   | <a href="#">orf19.3974</a> | Putative delta-1-pyrroline-5-carboxylate dehydrogenase                                                                                                                                  | 3.14  | 1.48E-182 |
| <i>Nitric Oxide Detoxification</i>     | YHB1   | <a href="#">orf19.3707</a> | Nitric oxide dioxygenase                                                                                                                                                                | -1.60 | 4.41E-02  |
| <i>Oxidative Stress Response Genes</i> | CAT1   | <a href="#">orf19.6229</a> | catalase                                                                                                                                                                                | 2.44  | 6.90E-37  |
|                                        | SOD5   | <a href="#">orf19.2060</a> | superoxide dismutase; induced by hyphal growth, osmotic/oxidative stress                                                                                                                | 2.48  | 7.64E-03  |
|                                        | SOD4   | <a href="#">orf19.2062</a> | superoxide dismutase                                                                                                                                                                    | 2.50  | 5.96E-11  |
